# Supplementary material for: Arf1-dependent LRBA recruitment to Rab4 endosomes is required for endolysosome homeostasis
Source: PubMed Central journal article supplement (PMC11449124; doi:10.1083/jcb.202401167), 2024-09-26

# Source Data Figure 9

A

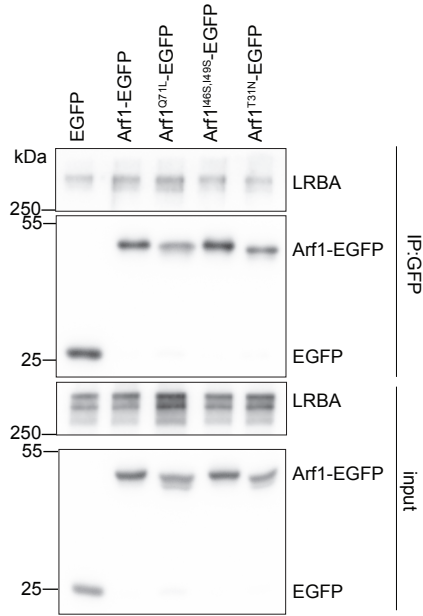

## Source blots

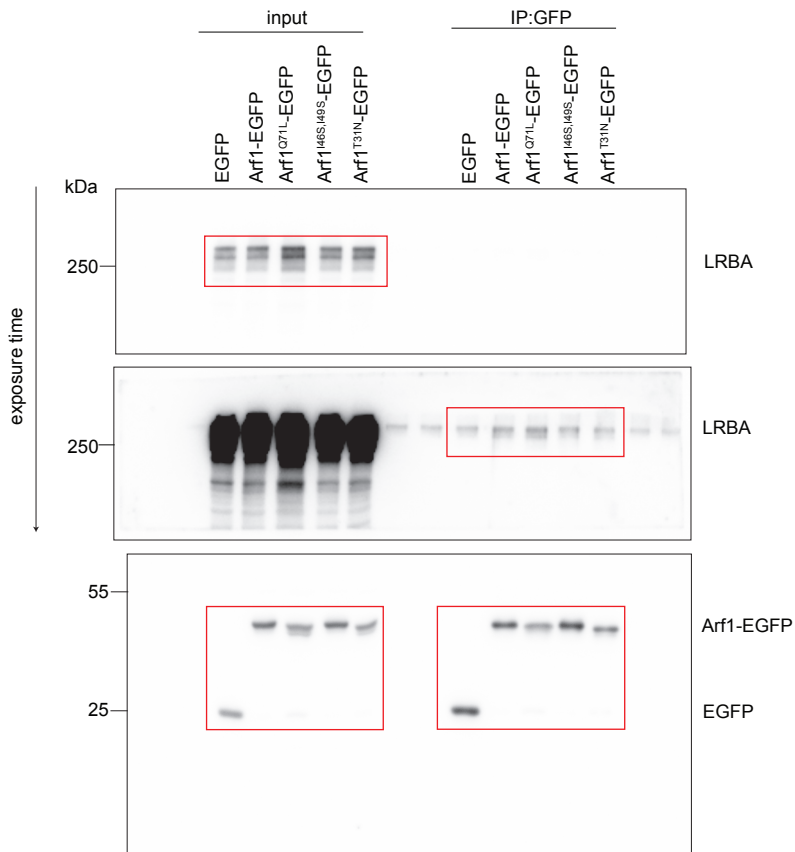

Supplement: JCB_202401167_SourceDataF9.pdf [file JCB_202401167_SourceDataF9.pdf]
