# Supplementary material for: Arf1-dependent LRBA recruitment to Rab4 endosomes is required for endolysosome homeostasis
Source: PubMed Central journal article supplement (PMC11449124; doi:10.1083/jcb.202401167), 2024-09-26
Supplement: JCB_202401167_SourceDataFS5.pdf [file JCB_202401167_SourceDataFS5.pdf]

# Source Data Figure S5

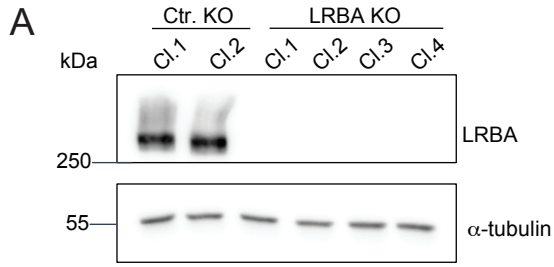

## Source blots

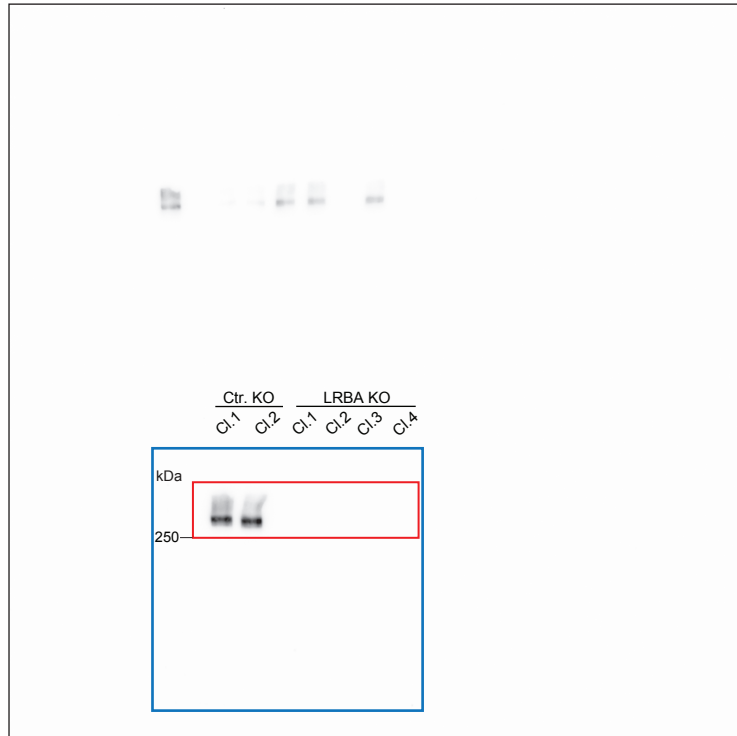

anti-LRBA

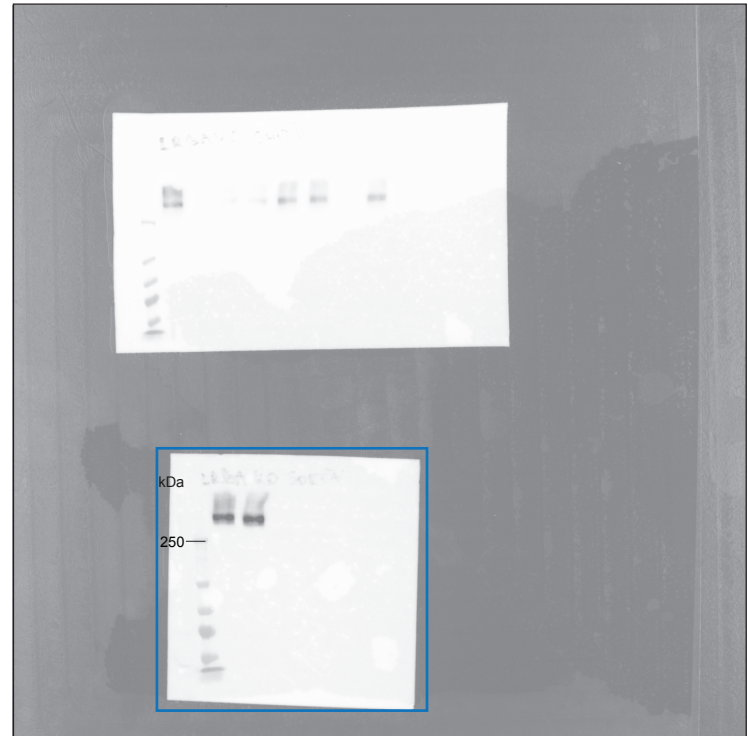

anti-LRBA+ladder

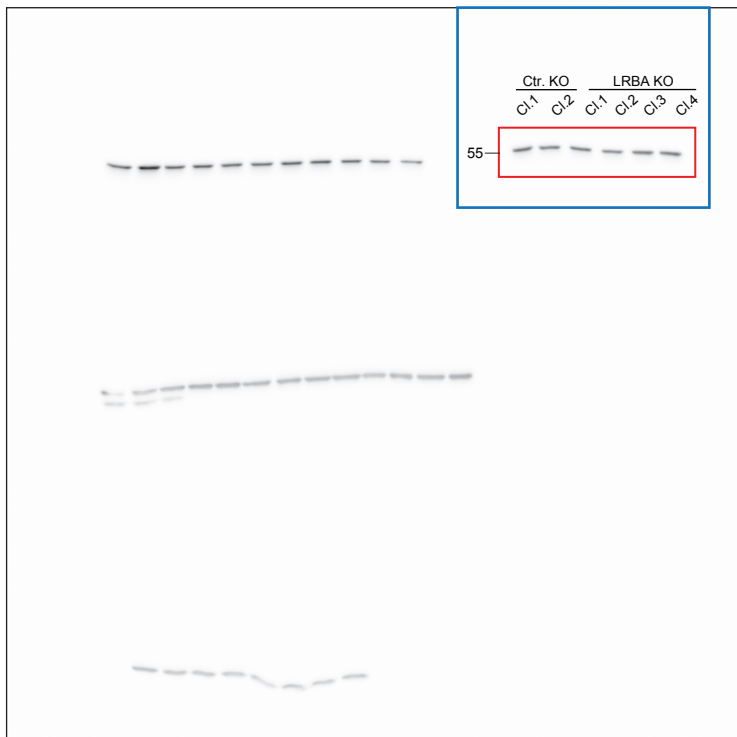

α-tubulin

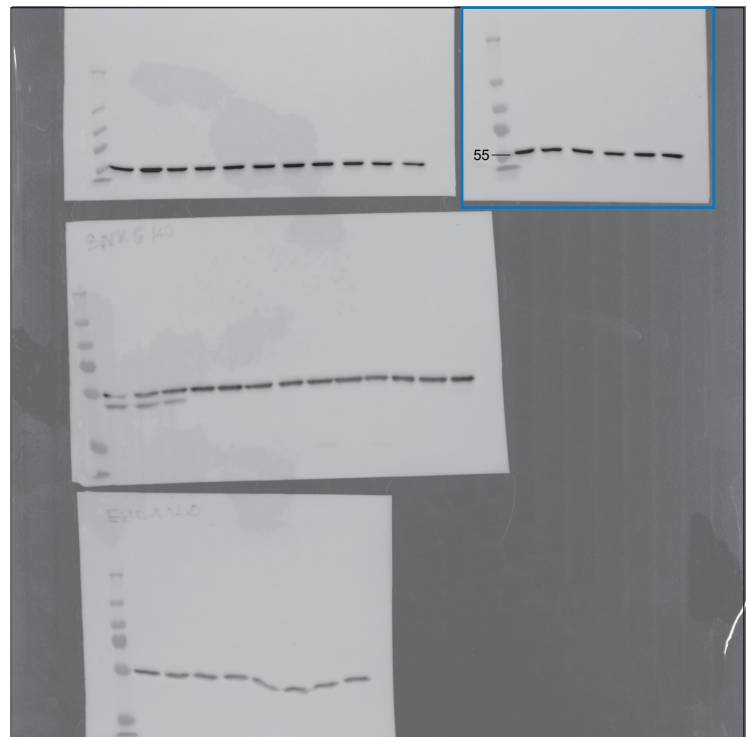

α-tubulin+ladder

cropped area shown on Figure S5, panel A

corresponding blot for Figure S5, panel A
